# Supplementary material for: An experimental and computational study on the material dispersion of 1-alkyl-3-methylimidazolium tetrafluoroborate ionic liquids
Source: Royal Society of Chemistry journal article supplement (doi:10.1039/d0cp01572e), 2020-01-01
Supplement: d0cp01572e1.pdf [file d0cp01572e1.pdf]

## Supporting Information

### An Experimental and Computational Study on Material Dispersion of 1-Alkyl-3-Methylimidazolium Tetrafluoroborate Ionic Liquids

Carlos Damián Rodríguez Fernández<sup>a</sup>, Yago Arosa<sup>a</sup>, Bilal Algnamat<sup>a,b</sup>, Elena López Lago<sup>a\*</sup>, Raúl de la Fuente<sup>a</sup>

<sup>a</sup> *Nanomateriais, Fotónica e Materia Branda (NaFoMat), Departamento de Física Aplicada e Departamento de Física de Partículas, Universidade de Santiago de Compostela, Campus Vida, E-15782 Santiago de Compostela, Spain*

<sup>b</sup> *Department of Physics, College of Science, Al-Hussein Bin Talal University, Ma'an, Jordan*

\*Corresponding author: [elena.lopez.lago@usc.es](mailto:elena.lopez.lago@usc.es)

Table S1. Experimental densities in g/cm<sup>3</sup> of the selected ILs at 11 different temperatures.

| T (K) | $\rho$ (g/cm <sup>3</sup> )                |                                            |                                            |                                            |                                            |                                            |                                             |
|-------|--------------------------------------------|--------------------------------------------|--------------------------------------------|--------------------------------------------|--------------------------------------------|--------------------------------------------|---------------------------------------------|
|       | [C <sub>2</sub> Mim]<br>[BF <sub>4</sub> ] | [C <sub>3</sub> Mim]<br>[BF <sub>4</sub> ] | [C <sub>4</sub> Mim]<br>[BF <sub>4</sub> ] | [C <sub>6</sub> Mim]<br>[BF <sub>4</sub> ] | [C <sub>7</sub> Mim]<br>[BF <sub>4</sub> ] | [C <sub>8</sub> Mim]<br>[BF <sub>4</sub> ] | [C <sub>10</sub> Mim]<br>[BF <sub>4</sub> ] |
| 293   | 1.284358                                   | 1.238723                                   | 1.204041                                   | 1.148754                                   | 1.126412                                   | 1.105994                                   | 1.066633                                    |
| 295   | 1.282830                                   | 1.237252                                   | 1.202615                                   | 1.147344                                   | 1.125030                                   | 1.104628                                   | 1.065257                                    |
| 297   | 1.281303                                   | 1.235780                                   | 1.201193                                   | 1.145930                                   | 1.123640                                   | 1.103250                                   | 1.063879                                    |
| 299   | 1.279776                                   | 1.234306                                   | 1.199769                                   | 1.144513                                   | 1.122252                                   | 1.101871                                   | 1.062504                                    |
| 301   | 1.278257                                   | 1.232833                                   | 1.198353                                   | 1.143160                                   | 1.120861                                   | 1.100490                                   | 1.061129                                    |
| 303   | 1.276741                                   | 1.231365                                   | 1.196937                                   | 1.141802                                   | 1.119475                                   | 1.099112                                   | 1.059756                                    |
| 305   | 1.275226                                   | 1.229899                                   | 1.195519                                   | 1.140441                                   | 1.118134                                   | 1.097730                                   | 1.058382                                    |
| 307   | 1.273712                                   | 1.228434                                   | 1.194140                                   | 1.139080                                   | 1.116799                                   | 1.096369                                   | 1.057007                                    |
| 309   | 1.272196                                   | 1.226969                                   | 1.192694                                   | 1.137711                                   | 1.115456                                   | 1.095046                                   | 1.055636                                    |
| 311   | 1.270689                                   | 1.225511                                   | 1.191276                                   | 1.136346                                   | 1.114119                                   | 1.093716                                   | 1.054265                                    |
| 313   | 1.269186                                   | 1.224050                                   | 1.189870                                   | 1.134985                                   | 1.112780                                   | 1.092389                                   | 1.052892                                    |

Table S2. Experimental refractive index at selected wavelengths at T=293 K (the letters correspond to the denomination of the Fraunhofer lines)

|                                         | P<br>(336.1 nm) | F<br>(486.1 nm) | D<br>(589.3 nm) | He:Ne<br>(633 nm) | Z<br>(822.7 nm) | (1470 nm) |
|-----------------------------------------|-----------------|-----------------|-----------------|-------------------|-----------------|-----------|
| [C <sub>2</sub> Mim][BF <sub>4</sub> ]  | 1.4398          | 1.4185          | 1.4129          | 1.4114            | 1.4073          | 1.4025    |
| [C <sub>3</sub> Mim][BF <sub>4</sub> ]  | 1.4465          | 1.4247          | 1.4190          | 1.4173            | 1.4130          | 1.4077    |
| [C <sub>4</sub> Mim][BF <sub>4</sub> ]  | 1.4505          | 1.4287          | 1.4229          | 1.4213            | 1.4168          | 1.4114    |
| [C <sub>6</sub> Mim][BF <sub>4</sub> ]  | 1.4571          | 1.4353          | 1.4296          | 1.4280            | 1.4236          | 1.4184    |
| [C <sub>7</sub> Mim][BF <sub>4</sub> ]  | 1.4594          | 1.4377          | 1.4319          | 1.4303            | 1.4261          | 1.4210    |
| [C <sub>8</sub> Mim][BF <sub>4</sub> ]  | 1.4611          | 1.4394          | 1.4337          | 1.4321            | 1.4279          | 1.4235    |
| [C <sub>10</sub> Mim][BF <sub>4</sub> ] | 1.4655          | 1.4438          | 1.4380          | 1.4364            | 1.4321          | 1.4274    |

Table S3. Experimental refractive index at selected wavelengths at T=303 K.

|                                         | P<br>(336.1 nm) | F<br>(486.1 nm) | D<br>(589.3 nm) | He:Ne<br>(633 nm) | Z<br>(822.7 nm) | (1470 nm) |
|-----------------------------------------|-----------------|-----------------|-----------------|-------------------|-----------------|-----------|
| [C <sub>2</sub> Mim][BF <sub>4</sub> ]  | 1.4372          | 1.4159          | 1.4103          | 1.4088            | 1.4047          | 1.3999    |
| [C <sub>3</sub> Mim][BF <sub>4</sub> ]  | 1.4435          | 1.4219          | 1.4162          | 1.4146            | 1.4104          | 1.4052    |
| [C <sub>4</sub> Mim][BF <sub>4</sub> ]  | 1.4477          | 1.4260          | 1.4202          | 1.4186            | 1.4143          | 1.4089    |
| [C <sub>6</sub> Mim][BF <sub>4</sub> ]  | 1.4541          | 1.4324          | 1.4267          | 1.4251            | 1.4209          | 1.4158    |
| [C <sub>7</sub> Mim][BF <sub>4</sub> ]  | 1.4563          | 1.4348          | 1.4291          | 1.4275            | 1.4233          | 1.4185    |
| [C <sub>8</sub> Mim][BF <sub>4</sub> ]  | 1.4581          | 1.4365          | 1.4308          | 1.4292            | 1.4250          | 1.4204    |
| [C <sub>10</sub> Mim][BF <sub>4</sub> ] | 1.4623          | 1.4407          | 1.4350          | 1.4334            | 1.4292          | 1.4244    |

Table S4. Experimental refractive index at selected wavelengths at T=313 K.

|                                         | P<br>(336.1 nm) | F<br>(486.1 nm) | D<br>(589.3 nm) | He:Ne<br>(633 nm) | Z<br>(822.7 nm) | (1470 nm) |
|-----------------------------------------|-----------------|-----------------|-----------------|-------------------|-----------------|-----------|
| [C <sub>2</sub> Mim][BF <sub>4</sub> ]  | 1.4346          | 1.4133          | 1.4078          | 1.4062            | 1.4021          | 1.3972    |
| [C <sub>3</sub> Mim][BF <sub>4</sub> ]  | 1.4405          | 1.4190          | 1.4135          | 1.4119            | 1.4078          | 1.4028    |
| [C <sub>4</sub> Mim][BF <sub>4</sub> ]  | 1.4449          | 1.4233          | 1.4176          | 1.4160            | 1.4117          | 1.4064    |
| [C <sub>6</sub> Mim][BF <sub>4</sub> ]  | 1.4511          | 1.4295          | 1.4239          | 1.4223            | 1.4181          | 1.4132    |
| [C <sub>7</sub> Mim][BF <sub>4</sub> ]  | 1.4533          | 1.4319          | 1.4263          | 1.4247            | 1.4206          | 1.4159    |
| [C <sub>8</sub> Mim][BF <sub>4</sub> ]  | 1.4551          | 1.4335          | 1.4279          | 1.4263            | 1.4221          | 1.4174    |
| [C <sub>10</sub> Mim][BF <sub>4</sub> ] | 1.4592          | 1.4377          | 1.4320          | 1.4304            | 1.4262          | 1.4214    |
